1 **ASM-Clust: classifying functionally diverse protein families using alignment score matrices**

2 Daan R. Speth<sup>1</sup> and Victoria J. Orphan<sup>1</sup>

3

4 <sup>1</sup> Division of Geological and Planetary Sciences, California Institute of Technology, Pasadena,  
5 CA, USA

6

7 **Correspondence:**

8 dspeth@caltech.edu or vorphan@gps.caltech.edu

9

10 **Abstract**

11 Rapid advances in sequencing technology have resulted in the availability of genomes from  
12 organisms across the tree of life. Accurately interpreting the function of proteins in these  
13 genomes is a major challenge, as annotation transfer based on homology frequently results in  
14 misannotation and error propagation. This challenge is especially pressing for organisms whose  
15 genomes are directly obtained from environmental samples, as interpretation of their physiology  
16 and ecology is often based solely on the genome sequence. For complex protein (super)families  
17 containing a large number of sequences, classification can be used to determine whether  
18 annotation transfer is appropriate, or whether experimental evidence for function is lacking. Here  
19 we present a novel computational approach for de novo classification of large protein  
20 (super)families, based on clustering an alignment score matrix obtained by aligning all sequences  
21 in the family to a small subset of the data. We evaluate our approach on the enolase family in the  
22 Structure Function Linkage Database.

23

24 **Availability and implementation**

25 ASM-Clust is implemented in bash with helper scripts in perl. Scripts comprising ASM-Clust are  
26 available for download from [https://github.com/dspeth/bioinfo\\_scripts/tree/master/ASM\\_clust/](https://github.com/dspeth/bioinfo_scripts/tree/master/ASM_clust/)

27

## 28 **Introduction**

29 The rapid advances in sequencing technology have led to a dramatic increase in available  
30 genome sequences. This genomic data has provided new perspectives on big questions in  
31 biology, such as the diversity of life, the distribution of metabolic traits across the tree of life,  
32 and the origin of eukaryotes (Hug et al. 2016; Zaremba-Niedzwiedzka et al. 2017; Borrel et al.  
33 2019). In addition, each newly available genome sequence contains novel protein sequences,  
34 yielding novel protein families of unknown function and expanding families with previously  
35 characterized representatives. Automatic functional annotation of novel protein sequences is  
36 generally done by annotation transfer from known homologous proteins, either using sequence  
37 alignment or hidden markov models (Altschul et al. 1990; Finn, Clements, and Eddy 2011). This  
38 approach can, and often does, result in misinterpretation of the function of proteins in  
39 mechanistically diverse superfamilies, and is prone to subsequent error propagation (Schnoes et  
40 al. 2009). Accurately interpreting the function of novel proteins is one of the grand challenges in  
41 biology, and relies heavily on availability of experimental data. Classifying mechanistically  
42 diverse protein superfamilies provides insight in knowledge gaps, can indicate whether  
43 annotation transfer is appropriate, and can help guide future experiments.

44 There are various automatic tools available for classification of proteins into isofunctional  
45 families using sequence similarity, active site characteristics, and phylogenetic relationships  
46 (Brown, Krishnamurthy, and Sjölander 2007; Lee, Rentzsch, and Orengo 2010; de Melo-  
47 Minardi, Bastard, and Artiguenave 2010; Leuthaeuser et al. 2016; Knutson et al. 2017).  
48 Alternatively, the structure of a protein family can be interactively explored using sequence  
49 similarity networks (SSNs) (Atkinson et al. 2009; Copp et al. 2018). SSNs are constructed based  
50 on pairwise all vs all alignment, with each node in the network representing a sequence, and each  
51 edge between two nodes representing the alignment between sequences. Clusters of nodes can be  
52 manually selected, or identified using a clustering algorithm such as MCL (Enright, Van  
53 Dongen, and Ouzounis 2002). SSNs are a powerful method to investigate protein families, but  
54 the network visualization limits the number of sequences that can be included, and alignments  
55 between separate domains of multi-domain proteins may confuse the analysis.

56 Here we present ASM-Clust, an alternative method that uses alignment score matrix (ASM)  
57 clustering. For each input sequence, ASM-Clust generates a profile consisting of a large number  
58 of alignment scores, including both presence/absence and weight, and uses this profile to classify

59 each sequence. For a dataset containing  $N$  sequences, alignments are generated for all  $N$   
60 sequences against a randomly selected subset of  $n$  sequences, and taking each alignment score, or  
61 a zero if the sequence did not align to the reference. This results in a matrix of  $N \times n$  values  
62 which is subsequently visualized using t-distributed stochastic neighbor embedding (t-SNE)  
63 (Van der Maaten and Hinton 2008; Van der Maaten 2014), and can be clustered using DBscan  
64 (Ester et al. 1996).

65

## 66 **Implementation**

67 ASM-Clust is implemented in bash with helper scripts in perl, and will take a protein fasta file as  
68 the sole input. Fasta files are processed with `ASM_clust.sh`, which 1) randomly selects a subset  
69 of  $n$  sequences (default 1000), 2) aligns the entire dataset to the subset of  $n$  sequences, 3)  
70 combines all scores into a matrix (inserting 0 for query-database pairs that did not produce an  
71 alignment), and 4) reduces the matrix to 2 dimensions using t-SNE (Figure 1a). For flexible  
72 usage, ASM-Clust supports alignment using DIAMOND (Buchfink, Xie, and Huson 2015),  
73 BLAST (Altschul et al. 1990), or MMSeqs2 (Steinegger and Söding 2017), and uses MMSeqs2  
74 as default alignment software. Clustering results are comparable between different alignment  
75 software (Supplemental Figure S1). Other user-defined options are the number of sequences in  
76 the subset (default 1000), the main t-SNE parameter “perplexity” (default 1000) and maximum  
77 iterations (default 5000) for dimensionality reduction, and the number of threads used by the  
78 alignment software (default 1). Although the clustering is generally similar with multiple  
79 randomly chosen subsets (Supplemental Figure S2), the subset can be defined for reproducibility.  
80 The output of `ASM_clust.sh` can be visualized as a scatterplot where each dot represents a  
81 sequence, and clusters are readily apparent (Figure 1b, Supplemental figure S1-S3). This format  
82 allows additional annotation with sequence features, such as taxonomy, length, or composition.  
83 The visualization in Figure 1b and Supplementary Figures S1-S3 was created using R, with the  
84 `ggplot2` package, and clusters were called using the `dbscan` package. The t-SNE result and the  
85 annotation data downloaded from SFLD were combined prior to visualization. Clusters obtained  
86 with ASM-Clust can be further refined by iteratively applying the method to a subset of poorly  
87 resolved data, such as the “hub”’s cluster (Supplementary Figure S3). The smaller total number of  
88 sequences in the second iteration, combined with lowering the perplexity value of the t-SNE,

89 increases the resolving power of the analysis for clades with a small number of sequences, thus  
 90 resolving rare classes with few members (Supplementary Figure S3).

91  
 92

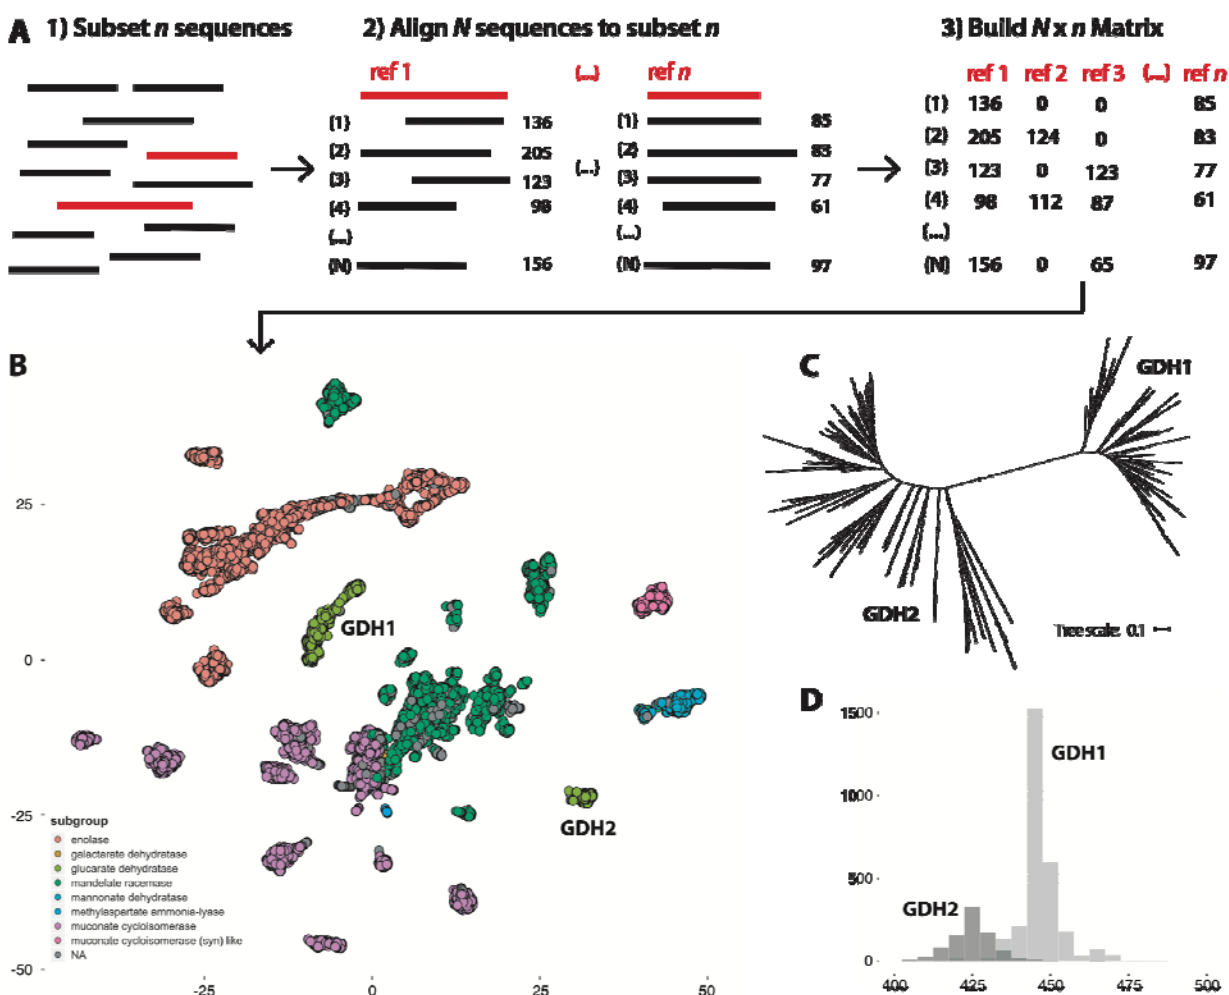

93

94

95 **Figure 1. ASM-clust workflow overview and enolase superfamily example.**

96 A) ASM-Clust workflow overview and B) example of the ASM-Clust output on the structure  
 97 function linkage database (SFLD) enolase superfamily (48,850 sequences). The clusters are  
 98 colored by SFLD subgroup: enolase (red), galactarate dehydratase (orange), glucarate  
 99 dehydratase (light green), mandelate racemase (dark green), mannonate dehydratase (light blue),  
 100 methylaspartate-ammonia lyase (dark blue), muconate cycloisomerase (purple), muconate  
 101 cycloisomerase (syn) like (pink), and no assigned subgroup (gray). The isofunctional ‘glucarate

102 dehydratase' subgroup is split in two clusters, indicated with GDH1 and GDH2. C) Phylogenetic  
103 analysis of the 'glucarate dehydratase' subgroup (clustered at 70% identity), and D) sequence  
104 length comparison confirms the clear separation of the two clusters.

105

## 106 **Results**

107 ASM-Clust was tested on the enolase superfamily in the gold-standard Structure Function  
108 Linkage Database (SFLD) (Akiva et al. 2014). Sequences and annotation data table were  
109 downloaded from the SFLD website (<http://sfld.rbvi.ucsf.edu>) and all 48,850 sequences were  
110 clustered using ASM-Clust with default settings, and visualized using R (Fig 1b). The  
111 'mannonate dehydratase' and 'muconate cycloisomerase (syn) like' subgroups, each containing  
112 only a single isofunctional family, are well resolved. As expected, the functionally diverse  
113 'muconate cycloisomerase' and 'mandelate racemase' subgroups each partition into multiple  
114 discrete clusters (Figure 1b). The isofunctional 'enolase' and 'glucarate dehydratase' subgroups  
115 also result in multiple clusters (Figure 1b). Phylogenetic analysis of the 'glucarate dehydratase'  
116 subgroup confirms that the observed clusters respond to distinct clades that can also be separated  
117 by sequence length (Figure 1c & 1d, Supplementary methods). The smaller methylaspartate  
118 ammonia-lyase and galactarate dehydratase subgroups (307 and 25 sequences respectively) are  
119 more clearly resolved when ASM-clust is iteratively rerun on the "hub" cluster with a lower  
120 perplexity value (Supplemental Figure S3). When prior high-quality annotation is not available,  
121 clusters can be inspected for phylogeny, taxonomic distribution, and conserved residues to assess  
122 whether they represent functionally divergent sequences.

123 ASM-Clust can retrieve clades from a complex superfamily with tens of thousands of sequences,  
124 without prior reduction of the dataset. We expect this to become increasingly relevant as the  
125 amount of sequence data from phylogenetically diverse organisms continues to grow rapidly, and  
126 meaningful information can be overlooked while pre-clustering a sequence dataset.

127

## 128 **Funding**

129 This work was supported by the US Department of Energy, Office of Science, Office of  
130 Biological and Environmental Research under award number DE-SC0016469 to Victoria J.  
131 Orphan. Daan R. Speth was supported by the Netherlands Organisation for Scientific Research,  
132 Rubicon award 019.153LW.039.

133 **References**

134

135 Akiva, Eyal, Shoshana Brown, Daniel E. Almonacid, Alan E. Barber 2nd, Ashley F. Custer,  
136 Michael A. Hicks, Conrad C. Huang, et al. 2014. “The Structure-Function Linkage Database.”  
137 *Nucleic Acids Research* 42 (Database issue): D521–30.

138

139 Altschul, S. F., W. Gish, W. Miller, E. W. Myers, and D. J. Lipman. 1990. “Basic Local  
140 Alignment Search Tool.” *Journal of Molecular Biology* 215 (3): 403–10.

141

142 Atkinson, Holly J., John H. Morris, Thomas E. Ferrin, and Patricia C. Babbitt. 2009. “Using  
143 Sequence Similarity Networks for Visualization of Relationships across Diverse Protein  
144 Superfamilies.” *PloS One* 4 (2): e4345.

145

146 Borrel, Guillaume, Panagiotis S. Adam, Luke J. McKay, Lin-Xing Chen, Isabel Natalia Sierra-  
147 García, Christian M. K. Sieber, Quentin Letourneur, et al. 2019. “Wide Diversity of Methane and  
148 Short-Chain Alkane Metabolisms in Uncultured Archaea.” *Nature Microbiology* 4 (4): 603–13.

149

150 Brown, Duncan P., Nandini Krishnamurthy, and Kimmen Sjölander. 2007. “Automated Protein  
151 Subfamily Identification and Classification.” *PLoS Computational Biology* 3 (8): e160.

152

153 Buchfink, Benjamin, Chao Xie, and Daniel H. Huson. 2015. “Fast and Sensitive Protein  
154 Alignment Using DIAMOND.” *Nature Methods* 12 (1): 59–60.

155

156 Copp, Janine N., Eyal Akiva, Patricia C. Babbitt, and Nobuhiko Tokuriki. 2018. “Revealing  
157 Unexplored Sequence-Function Space Using Sequence Similarity Networks.” *Biochemistry* 57  
158 (31): 4651–62.

159

160 Enright, A. J., S. Van Dongen, and C. A. Ouzounis. 2002. “An Efficient Algorithm for Large-  
161 Scale Detection of Protein Families.” *Nucleic Acids Research* 30 (7): 1575–84.

162

163 Ester, M., H. P. Kriegel, J. Sander, and X. Xu. 1996. "A Density-Based Algorithm for  
164 Discovering Clusters in Large Spatial Databases with Noise." KDD: Proceedings / International  
165 Conference on Knowledge Discovery & Data Mining. International Conference on Knowledge  
166 Discovery & Data Mining. <https://www.aaai.org/Papers/KDD/1996/KDD96-037.pdf>.  
167

168 Finn, Robert D., Jody Clements, and Sean R. Eddy. 2011. "HMMER Web Server: Interactive  
169 Sequence Similarity Searching." *Nucleic Acids Research* 39 (Web Server issue): W29–37.  
170

171 Hug, Laura A., Brett J. Baker, Karthik Anantharaman, Christopher T. Brown, Alexander J.  
172 Probst, Cindy J. Castelle, Cristina N. Butterfield, et al. 2016. "A New View of the Tree of Life."  
173 *Nature Microbiology* 1 (April): 16048.  
174

175 Knutson, Stacy T., Brian M. Westwood, Janelle B. Leuthaeuser, Brandon E. Turner, Don  
176 Nguyendac, Gabrielle Shea, Kiran Kumar, et al. 2017. "An Approach to Functionally Relevant  
177 Clustering of the Protein Universe: Active Site Profile-Based Clustering of Protein Structures  
178 and Sequences: Functionally Relevant Clustering of Protein Superfamilies." *Protein Science: A  
179 Publication of the Protein Society* 26 (4): 677–99.  
180

181 Lee, David A., Robert Rentzsch, and Christine Orengo. 2010. "GeMMA: Functional Subfamily  
182 Classification within Superfamilies of Predicted Protein Structural Domains." *Nucleic Acids  
183 Research* 38 (3): 720–37.  
184

185 Leuthaeuser, Janelle B., John H. Morris, Angela F. Harper, Thomas E. Ferrin, Patricia C.  
186 Babbitt, and Jacquelyn S. Fetrow. 2016. "DASP3: Identification of Protein Sequences Belonging  
187 to Functionally Relevant Groups." *BMC Bioinformatics* 17 (1): 458.  
188

189 Melo-Minardi, Raquel C. de, Karine Bastard, and François Artiguenave. 2010. "Identification of  
190 Subfamily-Specific Sites Based on Active Sites Modeling and Clustering." *Bioinformatics* 26  
191 (24): 3075–82.  
192

193 Schnoes, Alexandra M., Shoshana D. Brown, Igor Dodevski, and Patricia C. Babbitt. 2009.  
194 “Annotation Error in Public Databases: Misannotation of Molecular Function in Enzyme  
195 Superfamilies.” *PLoS Computational Biology* 5 (12): e1000605.  
196  
197 Steinegger, Martin, and Johannes Söding. 2017. “MMseqs2 Enables Sensitive Protein Sequence  
198 Searching for the Analysis of Massive Data Sets.” *Nature Biotechnology* 35 (11): 1026–28.  
199  
200 Van der Maaten, Laurens, and Geoffrey Hinton. 2008. “Visualizing Data Using T-SNE.” *Journal*  
201 *of Machine Learning Research: JMLR* 9 (Nov): 2579–2605.  
202  
203 Van Der Maaten, L. 2014. “Accelerating T-SNE Using Tree-Based Algorithms.” *Journal of*  
204 *Machine Learning Research: JMLR*.  
205 <http://www.jmlr.org/papers/volume15/vandermaaten14a/vandermaaten14a.pdf>.  
206  
207 Zaremba-Niedzwiedzka, Katarzyna, Eva F. Caceres, Jimmy H. Saw, Disa Bäckström, Lina  
208 Juzokaite, Emmelien Vancaester, Kiley W. Seitz, et al. 2017. “Asgard Archaea Illuminate the  
209 Origin of Eukaryotic Cellular Complexity.” *Nature* 541 (7637): 353–58.  
210  
211



**A 1) Subset  $n$  sequences**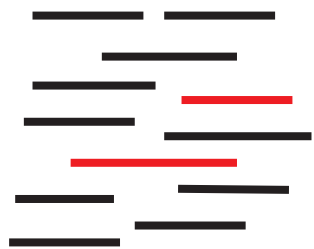**2) Align  $N$  sequences to subset  $n$** 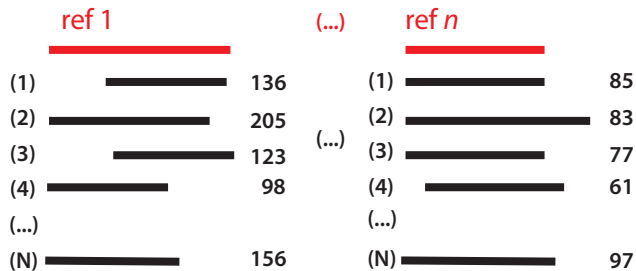**3) Build  $N \times n$  Matrix**

Diagram illustrating the construction of an  $N \times n$  matrix from the alignment results. The matrix is shown as a table of values representing the alignment scores for each sequence pair.

|       | ref 1 | ref 2 | ref 3 | (...) | ref $n$ |
|-------|-------|-------|-------|-------|---------|
| (1)   | 136   | 0     | 0     |       | 85      |
| (2)   | 205   | 124   | 0     |       | 83      |
| (3)   | 123   | 0     | 123   |       | 77      |
| (4)   | 98    | 112   | 87    |       | 61      |
| (...) |       |       |       |       |         |
| (N)   | 156   | 0     | 65    |       | 97      |

**B**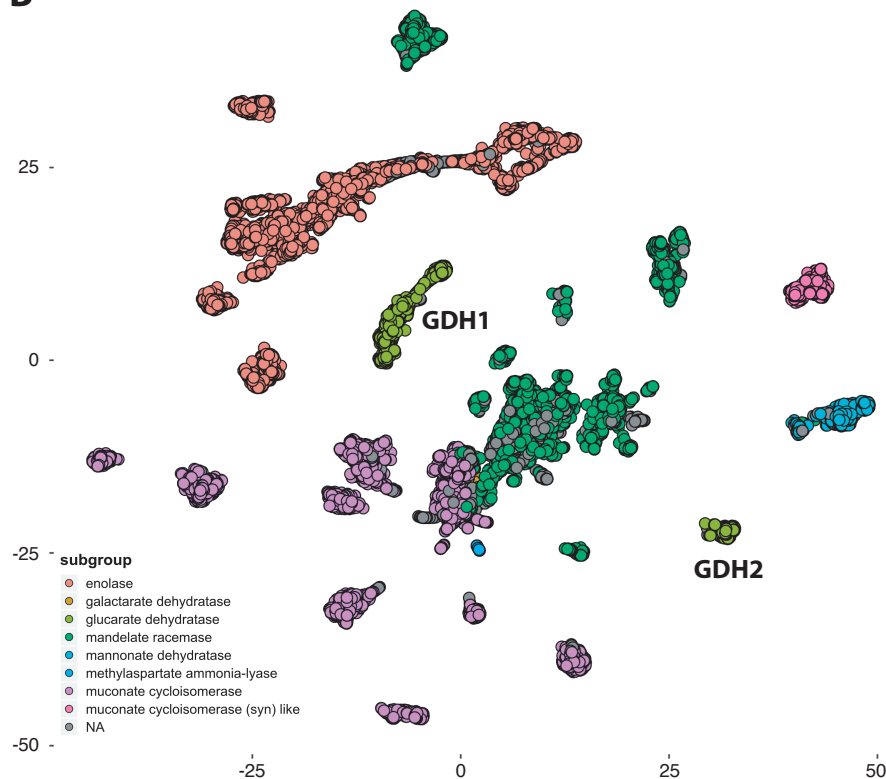**C**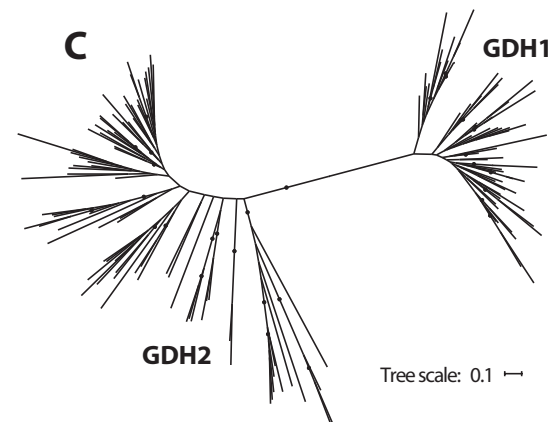**D**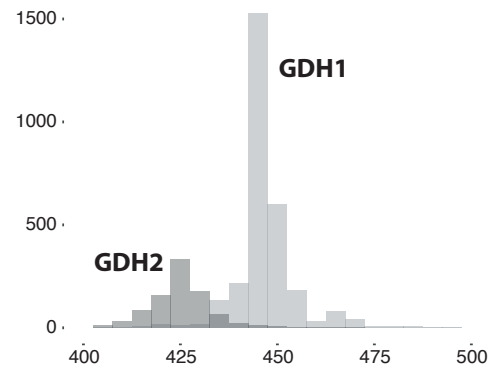

Source: https://www.biorxiv.org/content/10.1101/792739v1.full.pdf
